# Supplementary material for: Use of First-Line Immune Checkpoint Inhibitors and Association With Overall Survival Among Patients With Metastatic Melanoma in the Anti–PD-1 Era
Source: PubMed Central journal article supplement (PMC9412220; doi:10.1001/jamanetworkopen.2022.25459), 2022-08-25
Supplement: jamanetwopen-e2225459-s001.pdf [file jamanetwopen-e2225459-s001.pdf]

## Supplemental Online Content

Lamba N, Ott PA, Iorgulescu JB. Use of First-Line Immune Checkpoint Inhibitors and Association With Overall Survival Among Patients With Metastatic Melanoma in the Anti-PD-1 Era. *JAMA Netw Open*. 2022;5(8):e2225459. doi:10.1001/jamanetworkopen.2022.25459

**eTable.** Association Between First-Line ICI and OS in Stage IV Melanoma Patients Diagnosed Following FDA Approval, Using Multivariable Cox Regression

This supplemental material has been provided by the authors to give readers additional information about their work.

eTable. Association between first-line ICI and OS in stage IV melanoma patients diagnosed following FDA approval, using multivariable Cox regression

|                                        | All              |             |        |                  |             |        | Brain metastases    |             |       |                     |             |       | Liver metastases    |             |       |                     |             |       | High LDH         |             |       |                  |             |       |
|----------------------------------------|------------------|-------------|--------|------------------|-------------|--------|---------------------|-------------|-------|---------------------|-------------|-------|---------------------|-------------|-------|---------------------|-------------|-------|------------------|-------------|-------|------------------|-------------|-------|
| Landmark timepoint                     | Landmark 48 days |             |        | Landmark 78 days |             |        | Landmark 48 days    |             |       | Landmark 78 days    |             |       | Landmark 48 days    |             |       | Landmark 78 days    |             |       | Landmark 48 days |             |       | Landmark 78 days |             |       |
| n=                                     |                  | 3,408       |        |                  | 3,239       |        |                     | 1,251       |       |                     | 1,151       |       |                     | 802         |       |                     | 725         |       |                  | 725         |       |                  | 488         |       |
|                                        | HR               | 99% CI      | p val  | HR               | 99% CI      | p val  | HR                  | 99% CI      | p val | HR                  | 99% CI      | p val | HR                  | 99% CI      | p val | HR                  | 99% CI      | p val | HR               | 99% CI      | p val | HR               | 99% CI      | p val |
| <b>1st-line systemic therapy</b>       |                  |             |        |                  |             |        |                     |             |       |                     |             |       |                     |             |       |                     |             |       |                  |             |       |                  |             |       |
| Targeted/chemotherapy                  | Ref              |             |        | Ref              |             |        | Ref                 |             |       | Ref                 |             |       | Ref                 |             |       | Ref                 |             |       | Ref              |             |       | Ref              |             |       |
| ICI                                    | 0.76             | (0.65-0.88) | <0.001 | 0.72             | (0.62-0.85) | <0.001 | 0.78                | (0.63-0.97) | 0.003 | 0.74                | (0.59-0.94) | 0.001 | 0.82                | (0.63-1.08) | 0.06  | 0.77                | (0.58-1.03) | 0.019 | 0.78             | (0.54-1.12) | 0.07  | 0.77             | (0.52-1.13) | 0.08  |
| <b>Age at diagnosis, yr</b>            |                  |             |        |                  |             |        |                     |             |       |                     |             |       |                     |             |       |                     |             |       |                  |             |       |                  |             |       |
| <50                                    | 0.92             | (0.76-1.11) |        | 0.93             | (0.76-1.12) |        | 0.85                | (0.65-1.11) |       | 0.82                | (0.62-1.09) |       | 1.03                | (0.74-1.43) |       | 1.05                | (0.74-1.49) |       | 1.30             | (0.85-1.98) |       | 1.37             | (0.88-2.14) |       |
| 50-59                                  | 0.94             | (0.78-1.13) |        | 0.89             | (0.73-1.09) |        | 0.94                | (0.72-1.23) |       | 0.89                | (0.67-1.18) |       | 0.91                | (0.65-1.28) |       | 0.84                | (0.57-1.22) |       | 1.20             | (0.76-1.87) |       | 1.03             | (0.63-1.69) |       |
| 60-69                                  | Ref              |             |        | Ref              |             |        | Ref                 |             |       | Ref                 |             |       | Ref                 |             |       | Ref                 |             |       | Ref              |             |       | Ref              |             |       |
| 70-79                                  | 1.32             | (1.1-1.57)  |        | 1.29             | (1.07-1.56) |        | 1.25                | (0.95-1.63) |       | 1.19                | (0.89-1.58) |       | 1.41                | (1.01-1.96) |       | 1.44                | (1.01-2.06) |       | 1.27             | (0.78-2.06) |       | 1.30             | (0.78-2.17) |       |
| ≥80                                    | 1.60             | (1.29-1.98) |        | 1.55             | (1.24-1.94) |        | 1.28                | (0.88-1.88) |       | 1.13                | (0.74-1.73) |       | 1.29                | (0.86-1.94) |       | 1.35                | (0.87-2.09) |       | 1.72             | (0.99-2.97) |       | 1.65             | (0.91-2.98) |       |
| <b>Charlson-Deyo comorbidity index</b> |                  |             |        |                  |             |        |                     |             |       |                     |             |       |                     |             |       |                     |             |       |                  |             |       |                  |             |       |
| 0                                      | Ref              |             |        | Ref              |             |        | Ref                 |             |       | Ref                 |             |       | Ref                 |             |       | Ref                 |             |       | Ref              |             |       | Ref              |             |       |
| 1                                      | 1.06             | (0.88-1.27) |        | 1.09             | (0.9-1.32)  |        | 1.00                | (0.76-1.31) |       | 1.04                | (0.78-1.39) |       | 0.98                | (0.69-1.39) |       | 0.98                | (0.68-1.43) |       | 0.88             | (0.56-1.38) |       | 0.91             | (0.56-1.47) |       |
| ≥2                                     | 1.40             | (1.13-1.73) |        | 1.38             | (1.1-1.74)  |        | 1.18                | (0.85-1.64) |       | 1.18                | (0.83-1.67) |       | 1.23                | (0.79-1.9)  |       | 1.14                | (0.7-1.86)  |       | 1.07             | (0.58-1.99) |       | 1.07             | (0.55-2.1)  |       |
| <b>Radiotherapy</b>                    |                  |             |        |                  |             |        |                     |             |       |                     |             |       |                     |             |       |                     |             |       |                  |             |       |                  |             |       |
| No                                     | Ref              |             |        | Ref              |             |        | Ref                 |             |       | Ref                 |             |       | Ref                 |             |       | Ref                 |             |       | Ref              |             |       | Ref              |             |       |
| Yes                                    | 1.32             | (1.13-1.55) |        | 1.32             | (1.12-1.55) |        | 1.35                | (1.05-1.73) |       | 1.36                | (1.04-1.77) |       | 1.31                | (1-1.72)    |       | 1.26                | (0.94-1.69) |       | 1.36             | (0.95-1.94) |       | 1.31             | (0.89-1.92) |       |
| <b>Year of diagnosis, per yr</b>       | 0.95             | (0.87-1.02) |        | 0.94             | (0.87-1.03) |        | 1.00                | (0.89-1.13) |       | 1.01                | (0.89-1.15) |       | 0.95                | (0.82-1.1)  |       | 0.96                | (0.82-1.12) |       | 1.02             | (0.85-1.23) |       | 0.99             | (0.81-1.21) |       |
| <b>Surgery of non-primary site</b>     |                  |             |        |                  |             |        |                     |             |       |                     |             |       |                     |             |       |                     |             |       |                  |             |       |                  |             |       |
| No                                     | Ref              |             |        | Ref              |             |        | Ref                 |             |       | Ref                 |             |       | Ref                 |             |       | Ref                 |             |       | Ref              |             |       | Ref              |             |       |
| Yes                                    | 0.64             | (0.55-0.75) |        | 0.68             | (0.58-0.79) |        | 0.62                | (0.5-0.77)  |       | 0.67                | (0.54-0.84) |       | 0.71                | (0.51-1)    |       | 0.76                | (0.53-1.08) |       | 0.53             | (0.35-0.81) |       | 0.56             | (0.36-0.87) |       |
| <b>Brain metastases</b>                |                  |             |        |                  |             |        |                     |             |       |                     |             |       |                     |             |       |                     |             |       |                  |             |       |                  |             |       |
| No                                     | Ref              |             |        | Ref              |             |        |                     |             |       |                     |             |       | Ref                 |             |       | Ref                 |             |       | Ref              |             |       | Ref              |             |       |
| Yes                                    | 1.69             | (1.44-1.98) |        | 1.63             | (1.38-1.92) |        | All have brain mets |             |       | All have brain mets |             |       | 1.43                | (1.08-1.89) |       | 1.40                | (1.04-1.9)  |       | 1.14             | (0.8-1.63)  |       | 1.14             | (0.78-1.66) |       |
| <b>Lung metastases</b>                 |                  |             |        |                  |             |        |                     |             |       |                     |             |       |                     |             |       |                     |             |       |                  |             |       |                  |             |       |
| No                                     | Ref              |             |        | Ref              |             |        | Ref                 |             |       | Ref                 |             |       | Ref                 |             |       | Ref                 |             |       | Ref              |             |       | Ref              |             |       |
| Yes                                    | 1.10             | (0.97-1.25) |        | 1.06             | (0.93-1.21) |        | 1.19                | (0.98-1.45) |       | 1.15                | (0.93-1.42) |       | 1.05                | (0.82-1.34) |       | 0.97                | (0.74-1.26) |       | 1.22             | (0.89-1.68) |       | 1.14             | (0.81-1.59) |       |
| <b>Other organ metastases</b>          |                  |             |        |                  |             |        |                     |             |       |                     |             |       |                     |             |       |                     |             |       |                  |             |       |                  |             |       |
| No                                     | Ref              |             |        | Ref              |             |        | Ref                 |             |       | Ref                 |             |       | Ref                 |             |       | Ref                 |             |       | Ref              |             |       | Ref              |             |       |
| Yes                                    | 1.08             | (0.95-1.23) |        | 1.03             | (0.9-1.18)  |        | 1.01                | (0.82-1.23) |       | 0.97                | (0.78-1.2)  |       | 0.99                | (0.78-1.25) |       | 0.92                | (0.71-1.2)  |       | 1.08             | (0.8-1.46)  |       | 1.01             | (0.73-1.4)  |       |
| <b>Distant LN metastases</b>           |                  |             |        |                  |             |        |                     |             |       |                     |             |       |                     |             |       |                     |             |       |                  |             |       |                  |             |       |
| No                                     | Ref              |             |        | Ref              |             |        | Ref                 |             |       | Ref                 |             |       | Ref                 |             |       | Ref                 |             |       | Ref              |             |       | Ref              |             |       |
| Yes                                    | 1.10             | (0.96-1.26) |        | 1.11             | (0.96-1.28) |        | 1.08                | (0.87-1.35) |       | 1.09                | (0.86-1.38) |       | 0.99                | (0.78-1.27) |       | 0.99                | (0.76-1.29) |       | 1.11             | (0.81-1.51) |       | 1.12             | (0.8-1.57)  |       |
| <b>Liver metastases</b>                |                  |             |        |                  |             |        |                     |             |       |                     |             |       |                     |             |       |                     |             |       |                  |             |       |                  |             |       |
| No                                     | Ref              |             |        | Ref              |             |        | Ref                 |             |       | Ref                 |             |       |                     |             |       |                     |             |       | Ref              |             |       | Ref              |             |       |
| Yes                                    | 1.50             | (1.3-1.73)  |        | 1.44             | (1.24-1.68) |        | 1.35                | (1.08-1.7)  |       | 1.31                | (1.02-1.68) |       | All have liver mets |             |       | All have liver mets |             |       | 1.19             | (0.86-1.64) |       | 1.15             | (0.81-1.62) |       |
| <b>Bone metastases</b>                 |                  |             |        |                  |             |        |                     |             |       |                     |             |       |                     |             |       |                     |             |       |                  |             |       |                  |             |       |
| No                                     | Ref              |             |        | Ref              |             |        | Ref                 |             |       | Ref                 |             |       | Ref                 |             |       | Ref                 |             |       | Ref              |             |       | Ref              |             |       |
| Yes                                    | 1.57             | (1.36-1.81) |        | 1.57             | (1.35-1.83) |        | 1.37                | (1.1-1.72)  |       | 1.38                | (1.08-1.76) |       | 1.49                | (1.18-1.88) |       | 1.50                | (1.16-1.93) |       | 1.57             | (1.15-2.15) |       | 1.55             | (1.11-2.17) |       |

ICI = immune checkpoint inhibitor, HR = hazard ratio, CI = confidence interval, LN = lymph node

P values were only calculated and displayed for the primary association of interest, that between first-line ICI and OS. 99% CIs are reported for all other associations.
